# Supplementary material for: Phytoremediation Potential and Physiological Mechanisms Underlying Metallic Extraction of Suaeda glauca, Artemisia desertorum, and Atriplex canescens
Source: MDPI journal article supplement (doi:10.3390/ijerph192316035), 2022-11-30
Supplement: s1 [file s1]

Supplement Table S1.  
The background value of heavy metals in the mining tailings.

|          | Cd         | Cu      | Ni     | Pb      | Zn       |
|----------|------------|---------|--------|---------|----------|
|          | mg/kg soil |         |        |         |          |
| Tailings | 600.00     | 1530.00 | 156.00 | 4718.00 | 31736.00 |
